# Supplementary material
Source: HighWire-hosted journal article supplement (https://cmaj.ca/content/suppl/2009/09/22/cmaj.090694)
Supplement: appendix1_mediterranean.pdf [file appendix1_mediterranean.pdf]

**Appendix 1 (as supplied by the authors): Data on average daily mortality per each month over the last years in European Mediterranean countries and other selected countries worldwide.**

| Country<br>Period                                            | January       | February      | March                | April         | May           | June          | July                  | August                 | September              | October       | November      | December      |
|--------------------------------------------------------------|---------------|---------------|----------------------|---------------|---------------|---------------|-----------------------|------------------------|------------------------|---------------|---------------|---------------|
| <b>Average number of deaths per day (<math>\pm</math>SD)</b> |               |               |                      |               |               |               |                       |                        |                        |               |               |               |
| <i>European countries</i>                                    |               |               |                      |               |               |               |                       |                        |                        |               |               |               |
| Cyprus<br>1996, 1998-2000,<br>2002-2006                      | 17<br>(2)     | 16<br>(1)     | 16<br>(1)            | 14<br>(1)     | 13<br>(1)     | 13<br>(1)     | 14<br>(2)             | 14<br>(2)              | <b>12</b><br>(1)\$     | 13<br>(1)     | 14<br>(1)     | 15<br>(1)     |
| France<br>1995-2006 (excl.<br>2004)                          | 1699<br>(136) | 1649<br>(102) | 1568<br>(89)         | 1497<br>(56)  | 1413<br>(28)  | 1396<br>(31)  | 1391<br>(37)          | 1395<br>(155)          | <b>1366</b><br>(22)\$  | 1418<br>(19)  | 1464<br>(23)  | 1580<br>(70)  |
| Greece<br>1960-2005                                          | 282<br>(44)   | 278<br>(39)   | 264<br>(40)          | 240<br>(40)   | 225<br>(40)   | 220<br>(43)   | 226<br>(49)           | 216<br>(45)            | <b>200</b><br>(37)\$   | 215<br>(31)   | 238<br>(38)   | 259<br>(37)   |
| Italy<br>1950-2007                                           | 1721<br>(188) | 1706<br>(187) | 1597<br>(166)        | 1428<br>(122) | 1341<br>(118) | 1318<br>(127) | 1332<br>(144)         | 1280<br>(148)          | <b>1235</b><br>(117)\$ | 1340<br>(115) | 1444<br>(94)  | 1579<br>(174) |
| Spain<br>1960-1970,<br>1975-2007                             | 1070<br>(146) | 1018<br>(135) | 941<br>(121)         | 872<br>(107)  | 815<br>(101)  | 788<br>(112)  | 801<br>(125)          | 775<br>(127)           | <b>746</b><br>(109)\$  | 790<br>(115)  | 864<br>(102)  | 979<br>(101)  |
| Sweden<br>1987-2007                                          | 292<br>(18)   | 272<br>(13)   | 269<br>(15)          | 258<br>(11)   | 246<br>(7)    | 242<br>(8)    | 242<br>(6)            | <b>237</b><br>(6)\$    | 241<br>(6)             | 244<br>(6)    | 253<br>(8)    | 281<br>(26)   |
| <i>North America</i>                                         |               |               |                      |               |               |               |                       |                        |                        |               |               |               |
| Canada<br>1991-2006                                          | 656<br>(48)   | 637<br>(48)   | 624<br>(41)          | 591<br>(31)   | 574<br>(27)   | 560<br>(28)   | 552<br>(27)           | <b>546</b><br>(28)\$   | 552<br>(27)            | 583<br>(29)   | 592<br>(29)   | 626<br>(33)   |
| USA*<br>1973, 1975-2007                                      | 6574<br>(692) | 6608<br>(613) | 6306<br>(639)        | 6066<br>(535) | 5796<br>(511) | 5685<br>(464) | 5698<br>(453)         | <b>5560</b><br>(479)\$ | 5628<br>(496)          | 5808<br>(495) | 5869<br>(522) | 6158<br>(566) |
| <i>Oceania</i>                                               |               |               |                      |               |               |               |                       |                        |                        |               |               |               |
| Australia<br>1997-2006                                       | 327<br>(8)    | 325<br>(8)    | <b>324</b><br>(10)\$ | 336<br>(8)    | 353<br>(9)    | 383<br>(10)   | 404<br>(14)           | 408<br>(16)            | 386<br>(15)            | 359<br>(8)    | 344<br>(9)    | 337<br>(11)   |
| New Zealand<br>1980-2003#                                    | 66            | <b>65</b>     | 67                   | 70            | 74            | 80            | 86                    | 84                     | 80                     | 74            | 70            | 69            |
| <i>Asia</i>                                                  |               |               |                      |               |               |               |                       |                        |                        |               |               |               |
| Japan<br>2006-2007                                           | 3457<br>(99)  | 3133<br>(260) | 3187<br>(141)        | 3047<br>(35)  | 2883<br>(35)  | 2724<br>(25)  | <b>2701</b><br>(37)\$ | 2766<br>(105)          | 2727<br>(57)           | 2871<br>(112) | 3108<br>(70)  | 3302<br>(66)  |

**Abbreviations:** ADD = average deaths per day, SD = standard deviation.

\$ Month with lowest observed average daily mortality

\* Provisional data included as reported.

# Only cumulative monthly data for the whole period were publicly available.
